# Supplementary material for: Additional Evidence forDDB2T338M as a Genetic Risk Factor for Ocular Squamous Cell Carcinoma in Horses
Source: Hindawi journal article supplement (doi:10.1155/2019/3610965), 2019-09-15
Supplement: f1 [file 3610965.f1.pdf]

## Additional Evidence for *DDB2* T338M as a Genetic Risk Factor for Ocular Squamous Cell Carcinoma in Horses

Moriel H. Singer-Berk<sup>1</sup>, Kelly E. Knickelbein<sup>1,2</sup>, Zachary T. Lounsberry<sup>1</sup>, Margo Crausaz<sup>1</sup>, Savanna Vig<sup>1</sup>, Nikhil Joshi<sup>3</sup>, Monica Britton<sup>3</sup>, Matthew L. Settles<sup>3</sup>, Christopher M. Reilly<sup>4</sup>, Ellison Bentley<sup>5</sup>, Catherine Nunnery<sup>6</sup>, Ann Dwyer<sup>7</sup>, Mary E. Lassaline<sup>8</sup>, Rebecca R. Bellone<sup>1,9</sup>

### Supplemental Material

Table S1: Samples and affection status for horses utilized in this study.

| Samples used Previously* | Breed     | Number Affected (SCC all locations) |            |      |       | Number Unaffected |
|--------------------------|-----------|-------------------------------------|------------|------|-------|-------------------|
|                          |           | Ocular                              | Urogenital | Oral | Other |                   |
| 96                       | Haflinger | 47                                  | 0          | 0    | 0     | 49                |
| 43                       | Belgian   | 25                                  | 0          | 0    | 0     | 18                |
| <b>New Samples</b>       |           |                                     |            |      |       |                   |
| 27                       | Haflinger | 12                                  | 2          | 0    | 0     | 13                |
| 109                      | Appaloosa | 45                                  | 59         | 3    | 2**   | 0                 |
| 33                       | Arabian   | 18                                  | 12         | 2    | 1***  | 0                 |
| 3                        | Percheron | 3                                   | 0          | 0    | 0     | 1                 |

\*Bellone *et al.*, 2017, Singer-Berk *et al.*, 2018, and Knickelbein *et al.*, 2019

\*\*Included in this analysis were two Appaloosas with multiple SCC diagnosis. One was affected at both the ocular and urogenital regions and the other at the ocular and oral regions.

\*\*\*There was also one Arabian included that was confirmed affected with SCC of both ocular and urogenital regions.

Table S2: Primer sequences and PCR conditions for variants confirmed by Sanger sequencing or genotyped by PCR-RFLP analysis.

| SNP ID                                    | Forward Primer                                                     | Reverse Primer                                                        | Annealing Temperature (°C) | Cycles |
|-------------------------------------------|--------------------------------------------------------------------|-----------------------------------------------------------------------|----------------------------|--------|
| 12:g.12442525A>G                          | 5'-CATAGCCCA<br>TCCACAGTCCC-3'                                     | 5'-TCCAGTAACG<br>TGCTGTGCAA-3'                                        | 64                         | 32     |
| 12:g.10594033_10594034insAGC<br>AGCTCCAGC | 5'-56-FAM-<br>ACACTGT<br>TACCTGGGAAGCG<br>-3'                      | 5'-<br>TCCTTTTTGTCTT<br>CATTTGGTAGAA<br>-3'                           | 57                         | 35     |
| 12:g.12303010C>T                          | 5'-TAATGGCAGT<br>GGTAGGCACA-3'                                     | 5'-56-FAM-<br>AGGCGAT<br>CTAACCCCTCAAT<br>TCC-3'                      | 57                         | 36     |
| 12:g.12318425-_12318441insT               | 5'-TTT CCC AGT<br>CAC GAC GTT GCA<br>GTG GGT CTG CAA<br>GTG TG-3'  | 5'-M13FAM- GTT<br>TCT TGT AGA<br>CTA GAT TTC<br>TAT AGA ATT GG<br>-3' | 57                         | 35     |
| 12:g.12318425-_12318441insT               | 5'- TTT CCC AGT<br>CAC GAC GTT GAT<br>TGT GGT CAC CCC<br>TGG AG-3' | 5'-M13FAM- GTT<br>TCT TTT CCC<br>ACT TCT CTG<br>CTT TTG-3'            | 57                         | 35     |

Table S3: Variants prioritized for evaluation from filter 1 and their EquCab2 coordinates, polymorphism, Reference SNP ID, gene, variant type, and caller utilized to identify variant.

| SNP ID                     | Reference SNP ID | Position EquCab2     | Polymorphism                                      | Gene  | Type of variant           | Variant caller         |
|----------------------------|------------------|----------------------|---------------------------------------------------|-------|---------------------------|------------------------|
| 12:g.11760227T>G           | rs1139122190     | 12:11760227          | T > G                                             | RAPSN | intron variant            | Freebayes              |
| 12:g.11956103A>G           | rs394505241      | 12:11956103          | A > G                                             | AGBL2 | intron variant            | Freebayes              |
| 12:g.12318425_12318441insT | -                | 12:12318425-12318441 | CTTTTTTTTT<br>TTTTTTA ><br>CTTTTTTTTT<br>TTTTTTTA | PTPRJ | intron variant            | Freebayes              |
| 12:g.12442525A>G           | rs1150980285     | 12:12442525          | A > G                                             | N/A   | intergenic region variant | Freebayes and Samtools |

Table S4. Variants identified from remapping to EquCab3 and using filter 1 parameters. SNP ID, Reference SNP ID, EquCab3 position, polymorphism, gene, variant type, and caller utilized to identify variant are described.

| SNP ID            | Reference SNP ID | Position EquCab3 | Polymorphism | Gene  | Type of variant | Variant caller |
|-------------------|------------------|------------------|--------------|-------|-----------------|----------------|
| 12:g.11935134T>C  | rs394884702      | 11935134         | T > C        | CELF1 | intron_variant  | freebayes      |
| 12:g.12073152A>G* | rs394505241      | 12073152         | A > G        | AGBL2 | intron_variant  | samtools       |

\*SNP identified in both EquCab2 and EquCab3 analysis

Table S5: Variants prioritized for further evaluation using filter two criteria (mapped to EquCab2) and their relative position, alleles, gene, and predicted functional effect.

| SNP ID           | Reference SNP ID | Position | Polymorphism | Gene Involved      | Type of variant                            | Predicted Effect |
|------------------|------------------|----------|--------------|--------------------|--------------------------------------------|------------------|
| 12:g.10544757T>C | rs393821033      | 10544757 | T > C        | LARGE2             | missense variant                           | Moderate         |
| 12:g.12004293C>T | rs395357909      | 12004293 | C > T        | FNBP4              | missense variant                           | Moderate         |
| 12:g.12064892A>G | rs396307318      | 12064892 | A > G        | NUP160             | splice region variant, intron variant      | Low              |
| 12:g.11311198C>G | rs68918770       | 11311198 | C > G        | CKAP5              | intron variant                             | Modifier         |
| 12:g.11317109A>G | rs68918774       | 11317109 | A > G        | CKAP5, CKAP5-LRP4  | upstream gene variant, intergenic region   | Modifier         |
| 12:g.11754791A>C | rs393933135      | 11754791 | A > C        | RAPSN, PSMC3-RAPSN | downstream gene variant, intergenic region | Modifier         |
| 12:g.11756545T>C | rs395098279      | 11756545 | T > C        | RAPSN, PSMC3-RAPSN | downstream gene variant, intergenic region | Modifier         |
| 12:g.11757241C>A | rs397265292      | 11757241 | C > A        | RAPSN, PSMC3-RAPSN | downstream gene variant, intergenic region | Modifier         |
| 12:g.11757280T>C | rs394395559      | 11757280 | T > C        | RAPSN, PSMC3-RAPSN | downstream gene variant, intergenic region | Modifier         |

|                  |             |          |       |                           |                                                     |          |
|------------------|-------------|----------|-------|---------------------------|-----------------------------------------------------|----------|
| 12:g.11757948C>A | rs397066765 | 11757948 | C > A | RAPSN,<br>PSMC3-<br>RAPSN | downstream<br>gene variant,<br>intergenic<br>region | Modifier |
| 12:g.11760804C>G | rs397233884 | 11760804 | C > G | RAPSN                     | intron variant                                      | Modifier |
| 12:g.11762360C>T | rs395068088 | 11762360 | C > T | RAPSN                     | intron variant                                      | Modifier |
| 12:g.11762723G>A | rs395257098 | 11762723 | G > A | RAPSN                     | intron variant                                      | Modifier |
| 12:g.11763593C>G | rs394453963 | 11763593 | C > G | RAPSN                     | intron variant                                      | Modifier |
| 12:g.11764018A>T | rs68922985  | 11764018 | A > T | RAPSN                     | intron variant                                      | Modifier |
| 12:g.11764057C>T | rs397156951 | 11764057 | C > T | RAPSN                     | intron variant                                      | Modifier |
| 12:g.11764248A>G | rs395668179 | 11764248 | A > G | RAPSN                     | intron variant                                      | Modifier |
| 12:g.11764903G>C | rs394234717 | 11764903 | G > C | RAPSN                     | intron variant                                      | Modifier |
| 12:g.11764938A>G | rs394745750 | 11764938 | A > G | RAPSN                     | intron variant                                      | Modifier |

|                  |             |          |       |       |                |          |
|------------------|-------------|----------|-------|-------|----------------|----------|
| 12:g.11765122A>G | rs394078311 | 11765122 | A > G | RAPSN | intron variant | Modifier |
|------------------|-------------|----------|-------|-------|----------------|----------|

Table S6: Prioritized variants from Filter 3, genomic coordinates (EquCab2), alleles, gene, and predicted effect.

| SNP ID                                | Reference SNP ID | Position | Polymorphism         | Gene Involved | Type of variant                | Predicted Effect |
|---------------------------------------|------------------|----------|----------------------|---------------|--------------------------------|------------------|
| 12:g.10448429G>A                      | rs1140847537     | 10448429 | G > A                | SLC35C1       | missense variant               | Moderate         |
| 12:g.10483604G>A                      | rs782825759      | 10483604 | G > A                | CRY2          | missense variant               | Moderate         |
| 12:g.10527154G>A                      | rs1138376368     | 10527154 | G > A                | C11orf94      | missense variant               | Moderate         |
| 12:g.10594033_10594034insAGCAGCTCCAGC | -                | 10594033 | TT > TTGCTGGAGC TGCT | PHF21A        | conservative inframe insertion | Moderate         |
| 12:g.11185945A>C                      | rs1143834604     | 11185945 | A > C                | ZNF408        | missense variant               | Moderate         |
| 12:g.11187265G>A                      | rs1145066845     | 11187265 | G > A                | ZNF408        | missense variant               | Moderate         |
| 12:g.11189489C>T                      | rs782896651      | 11189489 | C > T                | ZNF408        | missense variant               | Moderate         |
| 12:g.11190608G>T                      | rs395005478      | 11190608 | G > T                | ZNF408        | missense variant               | Moderate         |
| 12:g.11200749A>G                      | rs68901053       | 11200749 | A > G                | F2            | missense variant               | Moderate         |



|                            |                          |          |         |         |                  |          |
|----------------------------|--------------------------|----------|---------|---------|------------------|----------|
| 12:g.11219937G>A           | rs782886448              | 11219937 | G > A   | CKAP5   | missense variant | Moderate |
| 12:g.11563067T>C           | rs397339518              | 11563067 | T > C   | ARFGAP2 | missense variant | Moderate |
| c.1013C>T*                 | rs1139682898             | 11608667 | C > T   | DDB2    | missense variant | Moderate |
| 12:g.11643898G>A           | rs68921652               | 11643898 | G > A   | MADD    | missense variant | Moderate |
| 12:g.11874540A>C           | rs1138397738             | 11874540 | A > C   | FAM180B | missense variant | Moderate |
| 12:11980715_11980716ins GT | rs1138587553rs1142374616 | 11980715 | GG > AC | AGBL2   | missense variant | Moderate |
| 12:g.11984978T>C           | rs396768162              | 11984978 | T > C   | AGBL2   | missense variant | Moderate |
| 12:g.11990634C>T           | rs395199588              | 11990634 | C > T   | AGBL2   | missense variant | Moderate |
| 12:g.12303010C>T           | rs393935064              | 12004291 | C > T   | FNBP4   | missense variant | Moderate |
| 12:g.12303010G>A           | rs1138536580             | 12303010 | G > A   | PTPRJ   | missense variant | Moderate |

|                  |              |          |       |                            |                       |          |
|------------------|--------------|----------|-------|----------------------------|-----------------------|----------|
| 12:g.12310371A>G | rs395213493  | 12310371 | A > G | PTPRJ                      | missense variant      | Moderate |
| 12:g.12755911G>T | rs1136731882 | 12755911 | G > T | ENSECA<br>G000000<br>07578 | missense variant      | Moderate |
| 12:g.12756268G>A | rs1147537747 | 12756268 | G > A | ENSECA<br>G000000<br>07578 | missense variant      | Moderate |
| 12:g.12756288C>A | rs1147006452 | 12756288 | C > A | ENSECA<br>G000000<br>07578 | missense variant      | Moderate |
| 12:g.12756349G>T | rs1150502738 | 12756349 | G > T | ENSECA<br>G000000<br>07578 | missense variant      | Moderate |
| 12:g.12763013T>C | rs1140739982 | 12763013 | T > C | ENSECA<br>G000000<br>07591 | missense variant      | Moderate |
| 12:g.10565787G>A | rs396254195  | 10565787 | G > A | PHF21A                     | splice region variant | Low      |
| 12:g.10876198C>T | rs396007404  | 10876198 | C > T | CREB3L1                    | splice region variant | Low      |
| 12:g.11170565C>T | rs1143288338 | 11170565 | C > T | ARHGAP<br>1                | splice region variant | Low      |
| 12:g.11214354T>C | rs1145308378 | 11214354 | T > C | F2                         | splice region variant | Low      |

|                                    |              |          |                 |        |                             |     |
|------------------------------------|--------------|----------|-----------------|--------|-----------------------------|-----|
| 12:g.11239116A>G                   | rs1147385867 | 11239116 | A > G           | CKAP5  | splice<br>region<br>variant | Low |
| 12:g.11251848A>G                   | rs1147814017 | 11251848 | A > G           | CKAP5  | splice<br>region<br>variant | Low |
| 12:g.11614594T>A                   | rs395251245  | 11614594 | T > A           | ACP2   | splice<br>region<br>variant | Low |
| 12:g.11648582_11648588de<br>ITCATA | -            | 11648582 | GATCATA ><br>GA | MADD   | splice<br>region<br>variant | Low |
| 12:g.11655415T>C                   | rs1146047742 | 11655415 | T > C           | MADD   | splice<br>region<br>variant | Low |
| 12:g.11682487T>C                   | rs1137350264 | 11682487 | T > C           | MYBPC3 | splice<br>region<br>variant | Low |
| 12:g.12332341C>T                   | rs68914686   | 12332341 | C > T           | PTPRJ  | splice<br>region<br>variant | Low |

\**DDB2* risk variant that was identified previously in Bellone *et al.* 2017

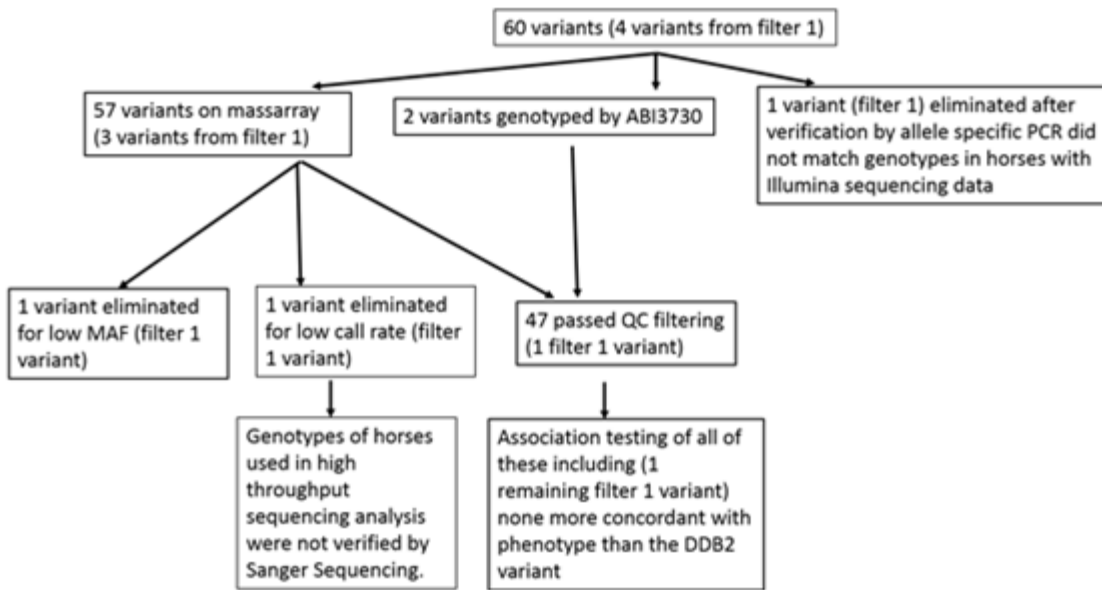

Figure S1: Flow diagram of variants from prioritization through analysis. This chart describes how all of the 60 prioritized variants were genotyped and analyzed. Only 57 were analyzed by MassArray while 3 additional variants were verified or genotyped using allele specific assays.

Table S7: Investigating gender with respect to SCC affection status in Haflingers.

|                                        | Male | Female | Total |
|----------------------------------------|------|--------|-------|
| Ocular SCC Affected                    | 27   | 32     | 59    |
| Unaffected                             | 26   | 35     | 61    |
| Total                                  | 53   | 67     | 120   |
| X <sup>2</sup> =0.1199, P-value = 0.73 |      |        |       |

Table S8: Ocular SCC cases by breed and their *DDB2* (c.1013C>T) genotypic distribution.

| Breed                 | Ocular SCC          | <i>DDB2</i> Genotype |           |            | Fishers Exact Test P-value |
|-----------------------|---------------------|----------------------|-----------|------------|----------------------------|
|                       |                     | C/C                  | C/T       | T/T        |                            |
| Appaloosa             | 46                  | 46                   | 0         | 0          | 1                          |
| Arabian               | 19                  | 19                   | 0         | 0          | 1                          |
| Belgian*              | 25                  | 4                    | 2         | 19         | <0.00001                   |
| Haflinger*            | 59 (12 new samples) | 6 (2 new)            | 8 (2 new) | 45 (8 new) | <0.00001                   |
| Rocky Mountain Horse* | 1                   | 0                    | 0         | 1          | 1                          |
| Percheron             | 3                   | 1                    | 2         | 0          | 1                          |

\*Genotype data reported in *Bellone et al.* 2017, *Singer-Berk et al.* 2018, *Knickelbein et al.*, 2018, and *Knickelbein et al.* 2019

Table S9: Breeds diagnosed with oral SCC and their respective genotypes for the *DDB2* variant c.1013C>T.

| Breed     | Oral SCC | <i>DDB2</i> Genotype |     |     |
|-----------|----------|----------------------|-----|-----|
|           |          | C/C                  | C/T | T/T |
| Appaloosa | 4        | 4                    | 0   | 0   |
| Arabian   | 2        | 2                    | 0   | 0   |
| Haflinger | 2        | 1                    | 1   | 0   |

Table S10: Urogenital SCC sample information and *DDB2* c.1013C>T genotypes.

| Breed     | Urogenital SCC | <i>DDB2</i> Genotype |     |     | Fishers Exact Test P-value |
|-----------|----------------|----------------------|-----|-----|----------------------------|
|           |                | C/C                  | C/T | T/T |                            |
| Appaloosa | 60             | 56                   | 4   | 0   | 1                          |
| Arabian   | 13             | 13                   | 0   | 0   | 1                          |
